# Supplementary material for: Evolution of autoimmune diagnostics over the past 10 years: lessons learned from the UK NEQAS external quality assessment EQA programs
Source: publisher site journal article supplement (doi:10.1515/cclm-2024-0781), 2025-01-08
Supplement: Supplementary file 1 [file j_cclm-2024-0781_suppl_001.docx]

Supplementary material

Table 3: Comparison between 2012 and 2021 in the percentage of answers complying with the expected value for each antibody.en

| <!--Col Count:15--> | | ANA (%) | ENA (%) | Centromere (%) | | aCL IgG/IgM (%) | β2GPI IgG/IgM (%) | ANCA (%) | GBM (%) | LKM (%) | AMA (%) |
| --- | --- | --- | --- | --- | --- | --- | --- | --- | --- | --- | --- |
| 2012 | | 97.5 | 91.1 | 99.1 | | 93.3 | 94.7 | 97.8 | 97.8 | 99.4 | 98.3 |
| 2021 | | 98.7 | 94.3 | 98.1 | | 92.2 | 97.0 | 98.4 | 99.5 | 99.6 | 99.4 |
| ***p(<0.05)*** | | 0.54 | 0.38 | 0.54 | | 0.76 | 0.62 | 0.75 | 0.29 | 0.84 | 0.46 |
|  | **ASMA (%)** | | **APCA (%)** | **AGA IgA/IgG (%)** | **DGP IgA/IgG (%)** | **tTG IgA/IgG (%)** | **EMA IgA/IgG (%)** | **ACPA (%)** | | **RF (%)** |  |
| 2012 | 94.6 | | 96.0 | 96.8 | 93.1 | 94.7 | 95.5 | 98.0 | | 96.4 |  |
| 2021 | 97.3 | | 86.4 | 97.6 | 93.5 | 98.3 | 94.0 | 98.0 | | 98.4 |  |
| ***p(<0.05)*** | 0.33 | | 0.01 | 0.73 | 0.90 | 0.16 | 0.63 | 1.00 | | 0.37 |  |

Table 4: Number of reports considered equivocal in celiac disease exercises for each analyte and year from 2012 to 2021.en

| <!--Col Count:13--> | No equivocal reports /no total reports | | | | | | | | | | Total equivocal reports ratio 2012–2021 | % equivocal reports 2012–2021 |
| --- | --- | --- | --- | --- | --- | --- | --- | --- | --- | --- | --- | --- |
| 2012 | 2013 | 2014 | 2015 | 2016 | 2017 | 2018 | 2019 | 2020 | 2021 |
| AGA IgA | 3/6 | 1/6 | 2/6 | 1/6 | 0/6 | 1/6 | 1/6 | 1/6 | 2/6 | 1/6 | 13/60 | 21.7 |
| AGA IgG | 0/6 | 1/6 | 0/6 | 1/6 | 1/6 | 1/6 | 1/6 | 0/6 | 1/6 | 1/6 | 7/60 | 11.7 |
| tTG IgA | 0/6 | 0/6 | 0/6 | 0/6 | 0/6 | 0/6 | 0/6 | 0/6 | 0/6 | 0/6 | 0/60 | 0 |
| tTG IgG | n.a. | 1/4 | 0/6 | 1/6 | 1/6 | 1/6 | 1/6 | 1/6 | 0/6 | 2/6 | 8/52 | 15.4 |
| DGP IgA | 3/6 | 1/6 | 2/6 | 0/6 | 1/6 | 1/6 | 1/6 | 1/6 | 3/6 | 0/6 | 13/60 | 21.7 |
| DGP IgG | 0/6 | 1/6 | 0/6 | 1/6 | 0/6 | 2/6 | 1/6 | 2/6 | 0/6 | 1/6 | 8/60 | 13.3 |
| EMA IgA | 0/6 | 1/6 | 0/6 | 0/6 | 0/6 | 0/6 | 1/6 | 0/6 | 1/6 | 0/6 | 3/60 | 5 |
| EMA IgG | n.a. | 1/4 | 0/6 | 1/6 | 1/6 | 3/6 | 2/6 | 0/6 | 1/6 | 3/6 | 12/52 | 23.1 |
|  |  |  |  |  |  |  |  |  |  |  | 64/464 | 13.8 |
